# Supplementary material for: Selective CO2 electroreduction to formate over a Cu-based catalyst in S2−-containing electrolyte
Source: Royal Society of Chemistry journal article supplement (doi:10.1039/d4cc02047b), 2024-01-01
Supplement: d4cc02047b1.pdf [file d4cc02047b1.pdf]

## Supplementary Information

### Selective CO<sub>2</sub> electroreduction to formate over Cu-based catalyst in S<sup>2-</sup>- containing electrolyte

Shuyu Liang<sup>1,2,#</sup>, Ziyi Fang<sup>1,2,#</sup>, Chaoran Yang<sup>1,2</sup>, Qiang Wang<sup>1,2,\*</sup>

<sup>1</sup>College of Environmental Science and Engineering, Beijing Forestry University,  
Beijing 100083, China

<sup>2</sup>State Key Laboratory of Efficient Production of Forest Resources, Beijing Forestry  
University, Beijing 100083, China

<sup>#</sup>Equal contribution

\*Email: [qiangwang@bjfu.edu.cn](mailto:qiangwang@bjfu.edu.cn) (Q. Wang)

## **Experimental Section**

### **Materials**

Copper chloride dihydrate ( $\text{CuCl}_2 \cdot 2\text{H}_2\text{O}$ , 99.99%), ascorbic acid ( $\text{C}_6\text{H}_8\text{O}_6$ , 99%), potassium sulfide ( $\text{K}_2\text{S}$ , 99%), and formic acid ( $\text{HCOOH}$ , 99%) were purchased from Aladdin Reagent Co., Ltd. (Shanghai, China). Sodium hydroxide ( $\text{NaOH}$ , 96%), potassium bicarbonate ( $\text{KHCO}_3$ , 99.7%), potassium hydroxide ( $\text{KOH}$ , 85%), and anhydrous ethanol ( $\text{C}_2\text{H}_5\text{OH}$ , 99.99%) were purchased from Beijing Innokai Technology Co., LTD. (Beijing, China). Nafion (5%) is purchased from Shanghai Sanshik Industrial Co., Ltd. (Shanghai, China).

### **Synthesis of $\text{Cu}_2\text{O}$**

$\text{Cu}_2\text{O}$  nanocube was synthesized by a previously reported ligand-free method with slight modification. 10 mL of 0.1 M  $\text{CuCl}_2 \cdot 2\text{H}_2\text{O}$  solution was added to 400 mL of deionized water, then 30 mL of 0.2 M  $\text{NaOH}$  solution was added to the solution to form a blue flocculent precipitate. After stirring for 5 min, 20 mL of 0.1 M ascorbic acid solution was added dropwise to the solution described above and further stirred for 1 hour. The solution was then washed several times with ethanol and water and finally dried in a vacuum oven.

For the catalyst ink preparation, 5 mg of the as-prepared catalyst was mixed with 1.0 mL ethanol and 20  $\mu\text{L}$  5 wt.% Nafion solution, and then ultrasonicated for at least 30 min. Then, 56  $\mu\text{L}$  of the ink was slowly drop-casted on the glassy carbon electrode with a diameter of 6 mm to obtain a catalyst loading of 1  $\text{mg cm}^{-2}$ .

### **Characterizations**

The morphology of the samples were characterized by field emission scanning electron microscopy (FESEM, SU8010) and transmission electron microscopy (TEM, FEI Talos F200S, operated at 200 kV). High-angle annular dark field scanning transmission electron microscopy (HAADF-STEM) and energy dispersive X-ray spectroscopy (EDX) were carried out on a FEI Talos F200S microscope. The crystal structure of the catalysts was analyzed by X-ray diffraction (XRD, Shimadzu-7000) equipped with Cu K $\alpha$  radiation. The surface composition of the samples was determined by X-ray photoelectron spectroscopy (XPS, Thermo Scientific ESCALAB 250Xi). All spectra of the sample were calibrated to the C 1s binding energy at 284.8 eV. XPS depth profiles were obtained by etching using an Ar ion beam.

### **Electrochemical measurements and product analysis**

The electrochemical measurements were performed in a commercial H-type cell separated by a Nafion 117 membrane. A Pt mesh and an Ag/AgCl electrode were used as the counter electrode and the reference electrode, respectively. The linear sweep voltammetry (LSV) tests were performed in CO<sub>2</sub>-saturated 0.1 M KHCO<sub>3</sub> electrolyte containing different concentrations of K<sub>2</sub>S (0, 0.01, 0.05, 0.25 mM) at a scan rate of 20 mV s<sup>-1</sup> in a potential range from 0 to -2.0 V vs. RHE. Constant electrolysis was performed at the potential window from -1.0 to -1.4 V vs. RHE (no IR correction) in the H-type cell.

The flow cell is composed of three chambers: gas, catholyte and anolyte chambers. The catalyst ink was dropped onto a gas diffusion layer (GDL, AvCarb GDS2230) with a catalyst loading of 0.5 mg cm<sup>-2</sup> to obtain the gas diffusion electrode (GDE). The

Ag/AgCl and Pt foil were used as the reference electrode and anode, respectively. A Nafion 117 membrane was employed to separate the catholyte from the anolyte chamber. In the flow cell, 1 M KOH was selected as electrolyte and a series of amounts of 50 mM K<sub>2</sub>S was added to reach the concentration of 0.00, 0.05, 0.25, 1.00 and 2.50 mM. CO<sub>2</sub> was flowed into the gas chamber behind the GDE at a rate of 20 mL min<sup>-1</sup>, and it can diffuse through the gas diffusion electrode to the surface of the catalyst and form a three-phase interface with the electrolyte. Constant electrolysis was performed at the current density window from -50 to -200 mA cm<sup>-2</sup> in the flow cell.

The gas products were quantified by online gas chromatography (Shimadzu GC-2014C). A thermal conductivity detector (TCD) was employed to determine H<sub>2</sub>, and a flame ionization detector (FID) was used to determine CO, CH<sub>4</sub> and C<sub>2</sub>H<sub>4</sub>. The liquid product of formic acid/formate was determined by High-Performance Liquid Chromatography (HPLC, Shimadzu). The Faradaic efficiency (FE) was calculated through Eq. (1), where Q<sub>total</sub> is the total charge passed during electrolysis (C), N<sub>i</sub> is the number of moles for the target product (mol), n is the number of electrons transferred (e.g., 2 for CO), and F is the Faraday constant (96485 C mol<sup>-1</sup>).

$$FE = \frac{N_i \times n \times F}{Q_{total}} \times 100\% \quad (1)$$

**Fig. S1.** The HAADF-STEM image and the corresponding energy dispersive X-ray spectroscopy (EDX) elemental mappings of Cu<sub>2</sub>O.

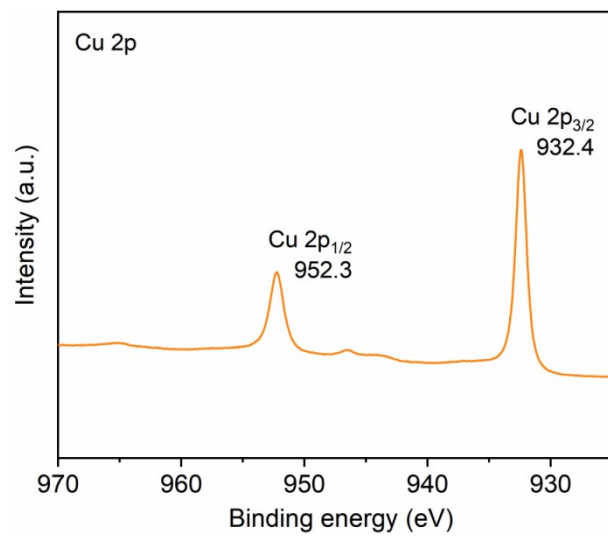

**Fig. S2.** Cu 2p XPS spectrum of Cu<sub>2</sub>O.

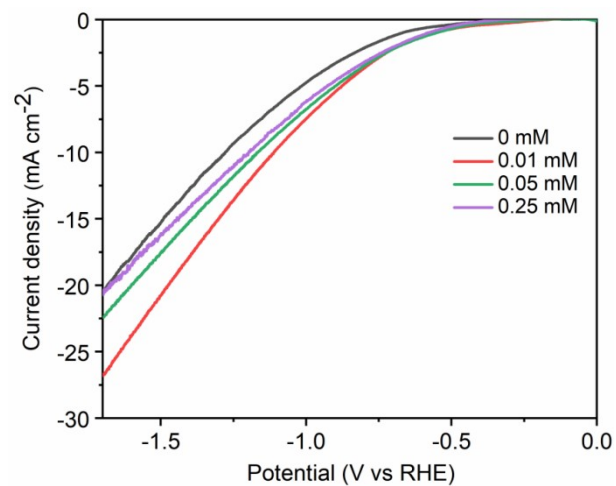

**Fig. S3.** LSV curves of Cu<sub>2</sub>O in CO<sub>2</sub>-saturated electrolytes containing different concentrations of K<sub>2</sub>S.

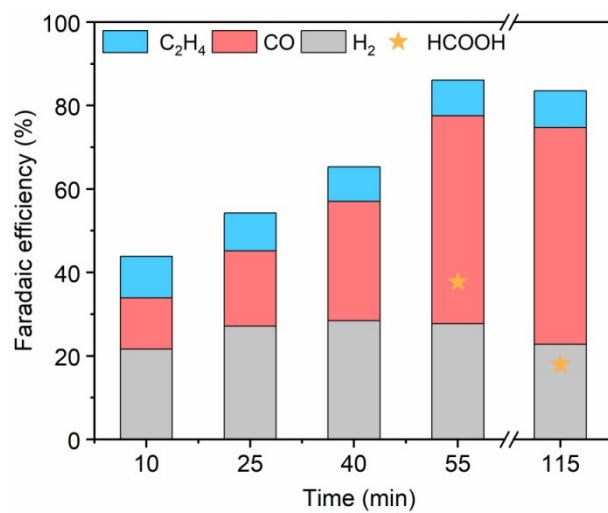

**Fig. S4.** The products' FE of Cu<sub>2</sub>O/Cu<sub>x</sub>S along with the reaction time.



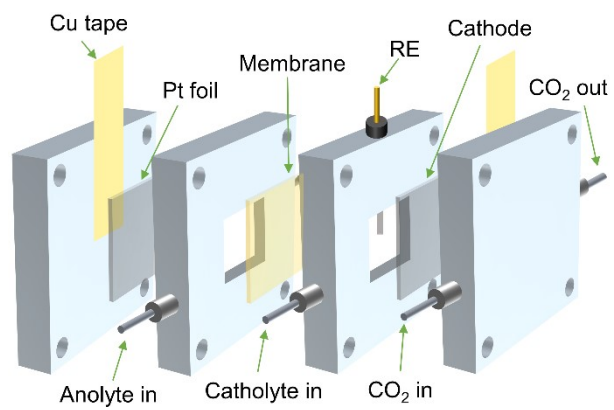

**Fig. S5.** Schematic illustration of the flow cell configuration.

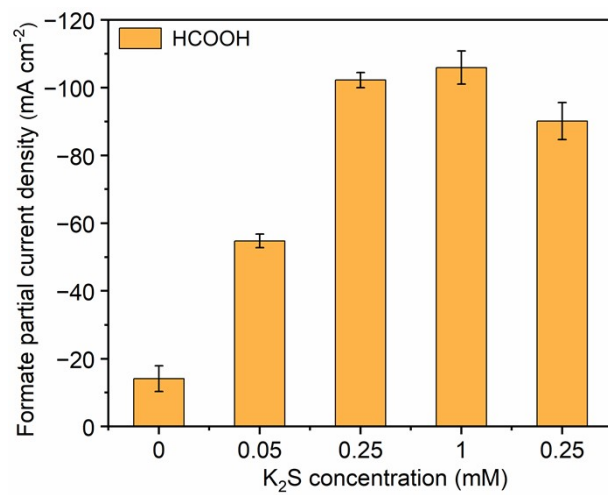

**Fig. S6.** Formate partial current density for Cu<sub>2</sub>O catalysts in electrolytes containing different concentrations of K<sub>2</sub>S at -150 mA cm<sup>-2</sup>.

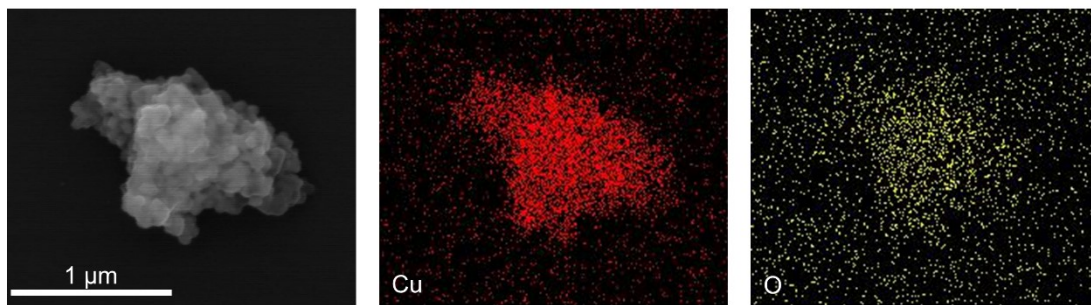

**Fig. S7.** The SEM image and the corresponding energy dispersive X-ray spectroscopy (EDX) elemental mappings of  $\text{Cu}_2\text{O}$  after  $\text{CO}_2$  RR.

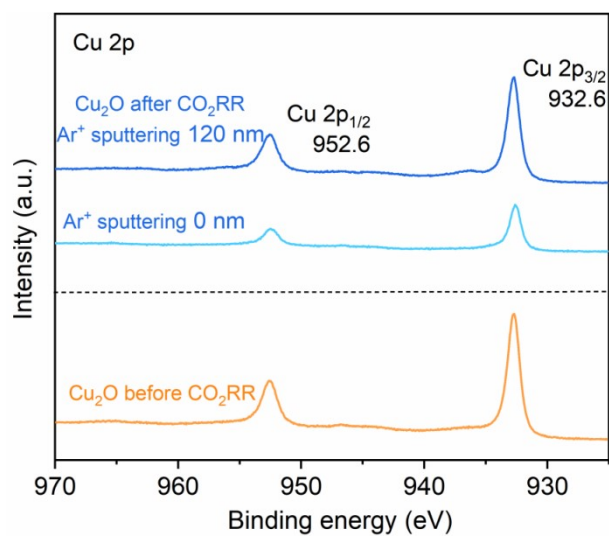

**Fig. S8.** Cu 2p XPS spectrum of Cu<sub>2</sub>O before and after CO<sub>2</sub>RR in the electrolyte containing K<sub>2</sub>S.

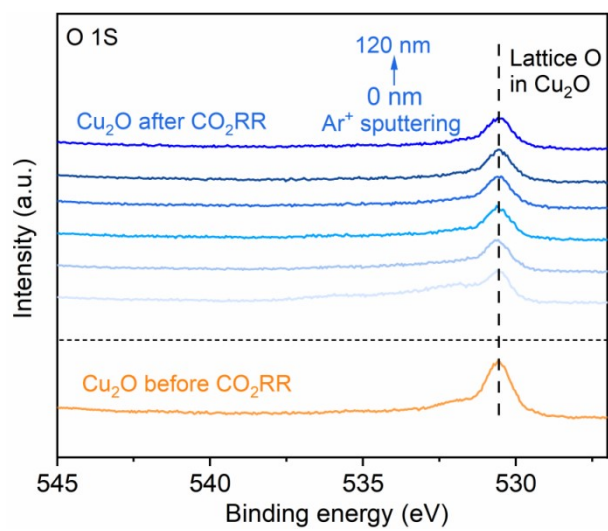

**Fig. S9.** O 1s spectrum of Cu<sub>2</sub>O before and after CO<sub>2</sub>RR in the electrolyte containing

K<sub>2</sub>S.

**Table. S1.** Performance comparison of Cu-based catalysts for CO<sub>2</sub> electroreduction to formate.

| Catalyst                                              | Electrolyte                                           | Potential<br>V vs. RHE | J <sub>formate</sub><br>(mA cm <sup>-2</sup> ) | Formate FE<br>(%)                                     |
|-------------------------------------------------------|-------------------------------------------------------|------------------------|------------------------------------------------|-------------------------------------------------------|
| Cu <sub>2</sub> O<br>(H-type cell)<br>This work       | 0.1 M KHCO <sub>3</sub> +<br>0.05 mM K <sub>2</sub> S | -1.2                   | 8.3                                            | 74                                                    |
| Cu <sub>2</sub> O<br>(Flow cell)<br>This work         | 1 M KOH+1<br>mM K <sub>2</sub> S                      | /                      | 105.9                                          | 70.6                                                  |
| Commercial<br>Cu <sub>2</sub> S <sup>1</sup>          | 0.1 M KHCO <sub>3</sub>                               | -0.86                  | ~3.6                                           | ~36                                                   |
| CuS <sup>2</sup>                                      | 0.1 M KHCO <sub>3</sub>                               | -0.6                   | 1.5                                            | 98 (keep decreasing<br>from 98% to 40%<br>during 8 h) |
| 5% PTFE Cu<br>array <sup>3</sup>                      | 0.1 M KHCO <sub>3</sub>                               | -0.7                   | 2.3                                            | 41                                                    |
| Cu <sub>2</sub> S NSs/C <sup>4</sup><br>(H-type cell) | 0.1 M KHCO <sub>3</sub>                               | -1.2                   | 8.9                                            | 71.4                                                  |
| Cu <sub>2</sub> S NSs/C <sup>4</sup><br>(Flow cell)   | 0.1 M KHCO <sub>3</sub>                               | /                      | 205                                            | 82                                                    |
| S-doped Cu/Cu<br>foil <sup>5</sup>                    | 0.1 M KHCO <sub>3</sub>                               | -0.8                   | 10.7                                           | 75                                                    |
| CuS 811<br>(H-type cell) <sup>6</sup>                 | 0.1 M KHCO <sub>3</sub>                               | -1.0                   | ~7.5                                           | 92                                                    |
| CuS 811<br>(flow cell) <sup>6</sup>                   | 1 M KOH                                               | /                      | 172                                            | 86                                                    |
| Cu <sub>2</sub> O/CuS <sup>7</sup>                    | 0.1 M KHCO <sub>3</sub>                               | -0.9 V                 | 15.3                                           | 67.6                                                  |
| S3-Cu <sub>2</sub> O-70 <sup>8</sup>                  | 0.1 M KHCO <sub>3</sub>                               | -0.9 V                 | 260<br>(flow cell)                             | 90                                                    |
| Cu nanoflower <sup>9</sup>                            | 0.1 M KHCO <sub>3</sub>                               | -1.6                   | 9                                              | 50                                                    |
| CuS/N <sub>x</sub> S-rGO <sup>10</sup>                | 0.5 M KHCO <sub>3</sub>                               | -0.63                  | ~4.8                                           | 82                                                    |
| AC-CuS <sub>x</sub> <sup>11</sup>                     | 0.1 M KHCO <sub>3</sub>                               | -0.9                   | 9                                              | 75                                                    |
| L-S CuS <sub>x</sub> <sup>12</sup>                    | 0.1 M KHCO <sub>3</sub>                               | -0.9                   | ~10                                            | 80                                                    |
| CuS/BM <sup>13</sup>                                  | 0.5 M KHCO <sub>3</sub>                               | -0.7                   | 75                                             | 67.8                                                  |

## Reference

- 1 L. Liang, L. Yang, T. Heine, A. Arinchtein, X. Wang, J. Hübner, J. Schmidt, A. Thomas and P. Strasser, *Advanced Energy Materials*, 2024, **14**.
- 2 M. Wang, X. Li, X. Ma, J. Wang, X. Jin, L. Zhang and J. Shi, *ChemSusChem*, 2023, **16**, e202300879.
- 3 Z. Cai, Y. Zhang, Y. Zhao, Y. Wu, W. Xu, X. Wen, Y. Zhong, Y. Zhang, W. Liu, H. Wang, Y. Kuang and X. Sun, *Nano Res.*, 2018, **12**, 345-349.
- 4 W. Liu, Y. Wen, N. Fang, M. Wang, Y. Xu and X. Huang, *Chem Commun (Camb)*, 2023, **59**, 11843-11846.
- 5 Y. Huang, Y. Deng, A. D. Handoko, G. K. L. Goh and B. S. Yeo, *ChemSusChem*, 2018, **11**, 320-326.
- 6 Y. Wang, H. Xu, Y. Liu, J. Jang, X. Qiu, E. P. Delmo, Q. Zhao, P. Gao and M. Shao, *Angew. Chem., Int. Ed.*, 2024, **63**, e202313858.
- 7 S. Wang, T. Kou, J. B. Varley, S. A. Akhade, S. E. Weitzner, S. E. Baker, E. B. Duoss and Y. Li, *ACS Mater. Lett.*, 2020, **3**, 100-109.
- 8 X. Ma, Y. Zhang, T. Fan, D. Wei, Z. Huang, Z. Zhang, Z. Zhang, Y. Dong, Q. Hong, Z. Chen and X. Yi, *Adv. Funct. Mater.*, 2023, **33**, 2213145.
- 9 J.-F. Xie, Y.-X. Huang, W.-W. Li, X.-N. Song, L. Xiong and H.-Q. Yu, *Electrochimica Acta*, 2014, **139**, 137-144.
- 10 Z. Wu, J. Yu, K. Wu, J. Song, H. Gao, H. Shen, X. Xia, W. Lei and Q. Hao, *Appl. Surf. Sci.*, 2022, **575**, 151796.
- 11 L. Mandal, K. R. Yang, M. R. Motapothula, D. Ren, P. Lobaccaro, A. Patra, M. Sherburne, V. S. Batista, B. S. Yeo, J. W. Ager, J. Martin and T. Venkatesan, *ACS Appl. Mater. Interfaces*, 2018, **10**, 8574-8584.
- 12 T. Shinagawa, G. O. Larrazábal, A. J. Martín, F. Krumeich and J. Pérez-Ramírez, *ACS Catal.*, 2018, **8**, 837-844.
- 13 T. Dou, Y. Qin, F. Zhang and X. Lei, *ACS Appl. Energy Mater.*, 2021, **4**, 4376-4384.
